# Supplementary material
Source: Springer Nature journal article supplement (https://www.springermedizin.de/resource/supplementary/12245_2010_34_MOESM3_ESM.pdf/9672626)

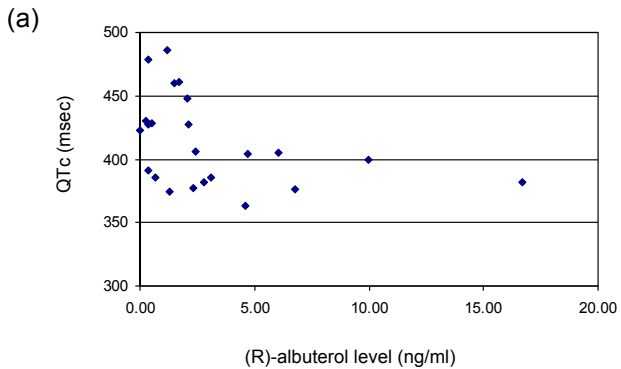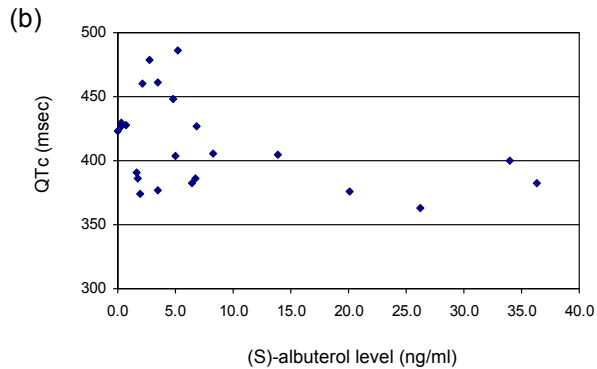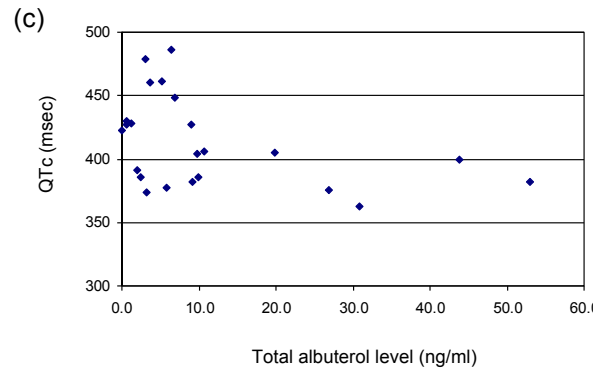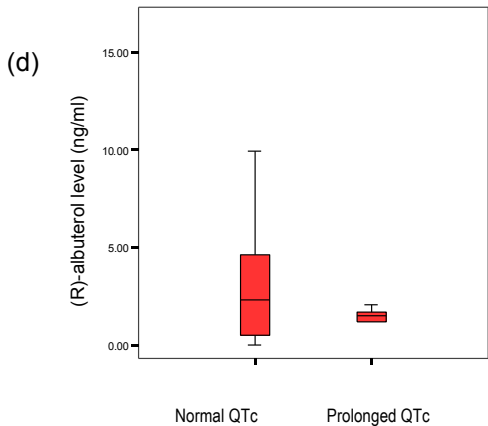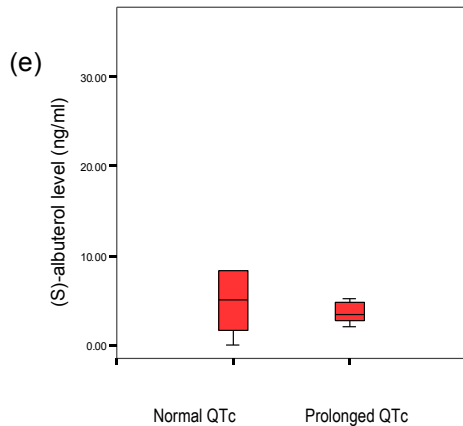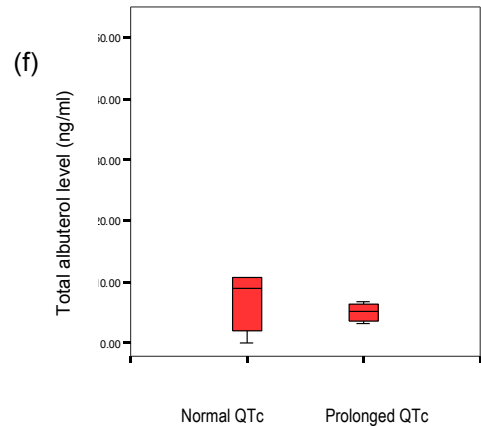

Supplement: MOESM3 [file 9672626]
